# Supplementary material for: Surveillance of dengue vectors using spatio-temporal Bayesian modeling
Source: Springer Nature journal article supplement (doi:10.1186/s12911-015-0219-6), 2015-11-13

SA6 - trap 1

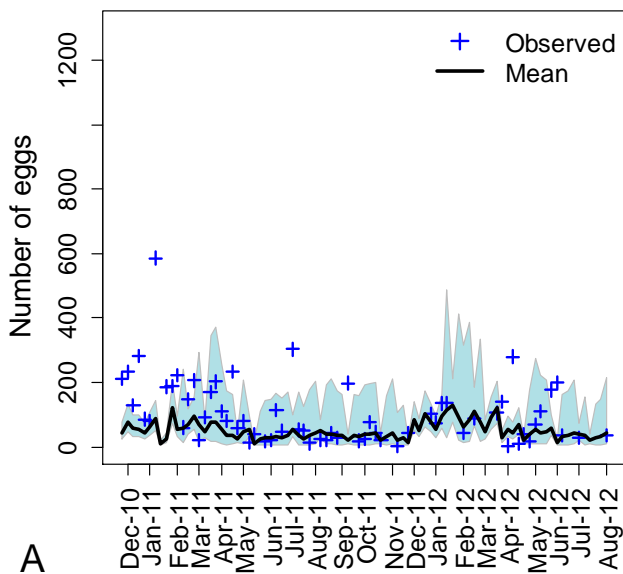

SA6 - trap 2

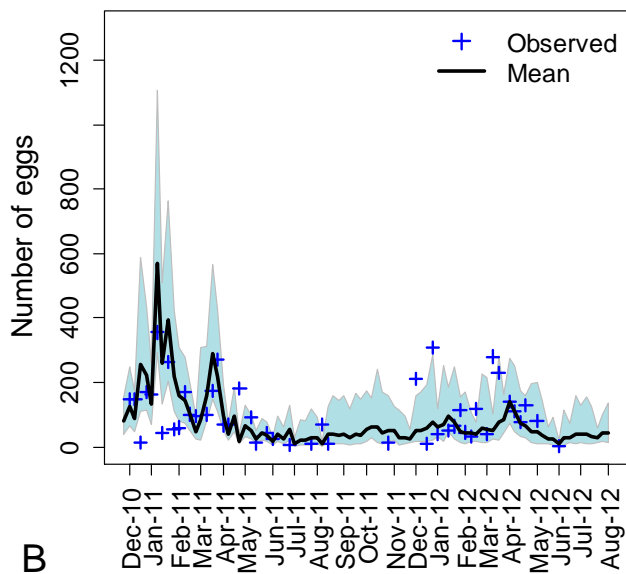

SA6 - trap 3

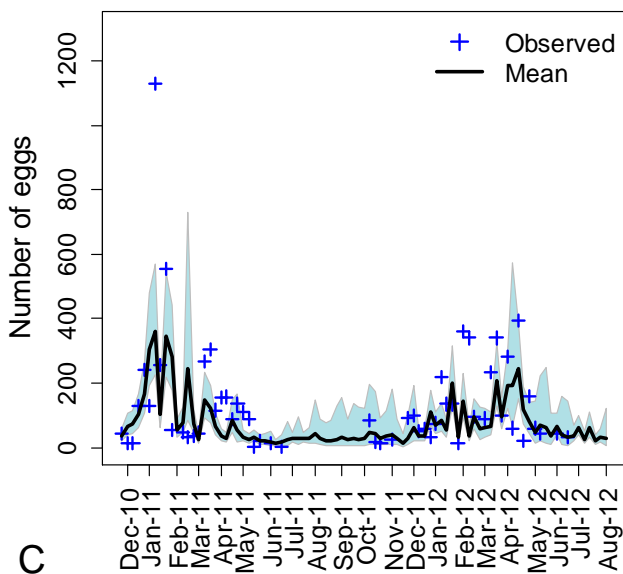

SA6 - trap 4

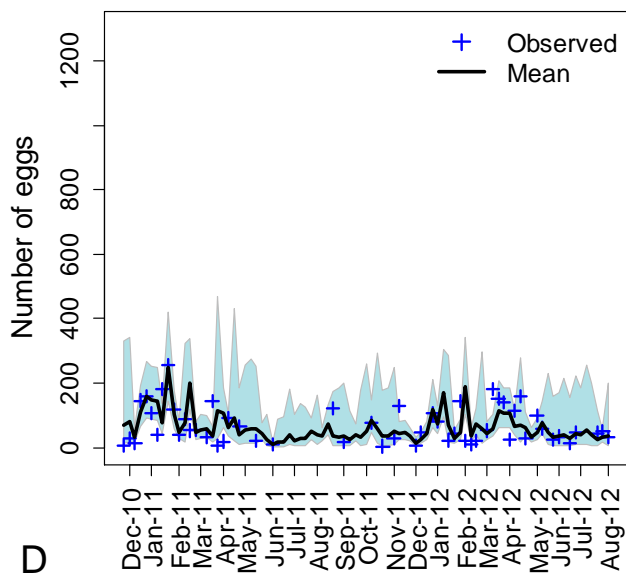

SA6 - trap 5

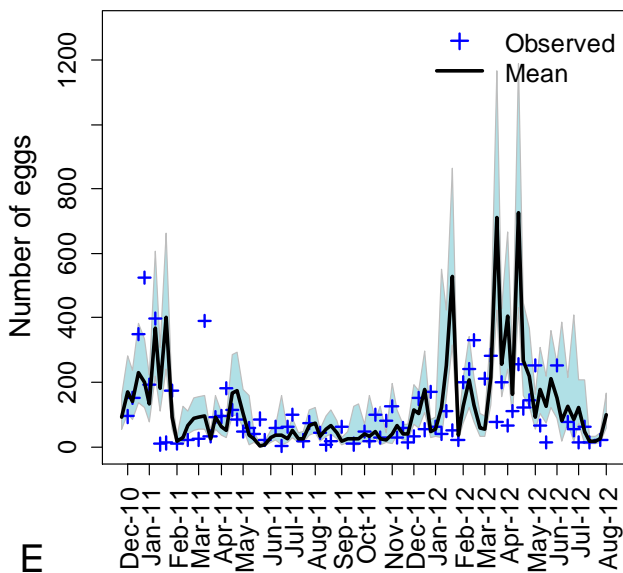

SA6 - trap 6

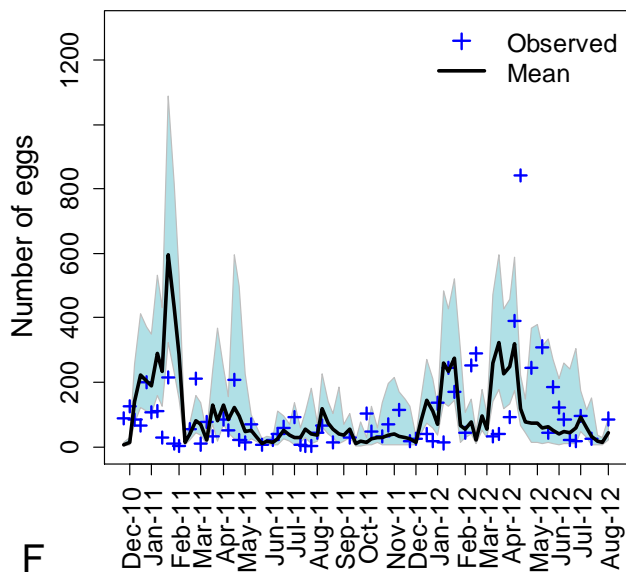

Supplement: MOESM1 [file 9756428]
